# Supplementary material for: Annotation of Potential Vaccine Targets and Designing of mRNA-Based Multi-Epitope Vaccine against Lumpy Skin Disease Virus via Reverse Vaccinology and Agent-Based Modeling
Source: MDPI journal article supplement (doi:10.3390/bioengineering10040430), 2023-03-28
Supplement: s1 [file s1]

# Supplementary Materials:

Table S1: Bovine alleles used for T –cells epitope prediction.

| S.NO | MHC1       | MHCII          |
|------|------------|----------------|
| 01   | BoLA-T2C   | BoLA-DRB3*0101 |
| 02   | BoLA-HD6   | BoLA-DRB3*0401 |
| 03   | BoLA-D18.4 | BoLA-DRB3*0501 |
| 04   | BoLA-T2a   | BoLA-DRB3*0801 |
| 05   | BoLA-T2b   | BoLA-DRB3*1103 |
| 06   | BoLA-JSP.1 | BoLA-DRB3*1902 |

Table S2: Designed vaccine constructs with allergenicity, antigenicity and solubility analysis.

| Vaccine construct | Adjuvant               | Construct                                                                                                                                                                                                                                                                                                                                                   | Allergenicity             | Antigenpro | Vaxijen | Solubility Protein-sol | Dock TLR2 | Dock TLR4 |
|-------------------|------------------------|-------------------------------------------------------------------------------------------------------------------------------------------------------------------------------------------------------------------------------------------------------------------------------------------------------------------------------------------------------------|---------------------------|------------|---------|------------------------|-----------|-----------|
| LSDV-V1           | Beta defensin adjuvant | EAAAKLALLFLVLSAGSGFT<br>QGVRNHVTCRINRGFCVPIR<br>CPGRTRQIGTCFGPRIKCCRS<br>WEAAAKAKFVAAWTLKAA<br>AGGGSEGVYLCSTITDTRCN<br>PGPGPKKALIIKEVKRKYLA<br>AYNVLDYDRSKGGGSHEYG<br>AEALERAGGGGSYGLVKKK<br>NNIWVDVNSGPGPKKNVS<br>IRHLKVISLAAYAFMLVSTIG<br>GGSEYGAEALERAGGGGS<br>YTTQQYCNVSPFINDNGPGP<br>GKKKTDLSSLKRRIQAAAYDK<br>KGCIVEFHEYGAEALERAGA<br>KFVAAWTLKAAAGGGS | Non allergen-<br>Allertop | 0.792602   | 0.5682  | 0.663                  | -884.2    | -963.8    |
| LSDV - V2         | Beta defensin adjuvant | EAAAKLALLFLVLSAGSGFT<br>QGVRNHVTCRINRGFCVPIR<br>CPGRTRQIGTCFGPRIKCCRS<br>WEAAAKAKFVAAWTLKAA<br>AGGGSNSVIGTNYELLCINT<br>KPGPGKKLIIKEVKRKYLSA<br>AYNSTIALGKNGGGSEHYG<br>AEALERAGGGGSLSNIKKSS<br>KGDINACYGPGPKKVSIIIC<br>VKRLYNAAYNVSCNYVSYG<br>GGSEYGAEALERAGGGGS<br>KGCIVEFGSQEKVCVTGPGP<br>GKKDLSLLKRRIQKVAAYDF<br>WIKFISIHEYGAEALERAGAK<br>FVAAWTLKAAAGGGS | Non allergen-<br>Allertop | 0.732347   | 0.5099  | 0.636                  | -796.4    | -1157.4   |

|           |                        |                                                                                                                                                                                                                                                                                                                                                                                                                                                                                |                        |          |        |       |        |         |
|-----------|------------------------|--------------------------------------------------------------------------------------------------------------------------------------------------------------------------------------------------------------------------------------------------------------------------------------------------------------------------------------------------------------------------------------------------------------------------------------------------------------------------------|------------------------|----------|--------|-------|--------|---------|
| LSDV - V3 | Beta defensin adjuvant | EAAAKLALLFLVLSAGSGFT<br>QGVRNHVTCRINRGFCVPIR<br>CPGRTRQIGTCFGPRIKCCRS<br>WEAAAKAKFVAAWTLKAA<br>AGGGSSITTDTRCNPKNLAL<br>KGP <del>PG</del> PKKIALIIEVKRKYA<br>AYTVNFLNSTIGGG <del>SH</del> EYGA<br>EALERAGGGGSSCNYSYIIC<br>VKRLYN <del>GP</del> <del>PG</del> <del>PK</del> KSIRHLKV<br>ISLTYAAYNYVSYIICVGGGS<br>HEYGAEALERAGGGGSKGCI<br>VEFGSQEKVCVT <del>GP</del> <del>PG</del> <del>PK</del> KV<br>FIKRQDVNTVLAA <del>Y</del> NTDDF<br>WIKFHEYGAEALERAGAKFV<br>AAWTLKAAAGGGGS | Non allergen- Allertop | 0.779016 | 0.5364 | 0.625 | -858.1 | -1026.2 |
|-----------|------------------------|--------------------------------------------------------------------------------------------------------------------------------------------------------------------------------------------------------------------------------------------------------------------------------------------------------------------------------------------------------------------------------------------------------------------------------------------------------------------------------|------------------------|----------|--------|-------|--------|---------|

Table S3: Refine models of vaccine construct LSDV-V2 predicted by GalaxyRefine server

| Model   | GDT-HA | RMSD  | MolProbity | Clash score | Poor rotamers | Rama favored |
|---------|--------|-------|------------|-------------|---------------|--------------|
| Initial | 1.0000 | 0.000 | 1.846      | 5.4         | 0.0           | 89.7         |
| MODEL 1 | 0.9872 | 0.290 | 2.097      | 12.4        | 0.9           | 91.8         |
| MODEL 2 | 0.9906 | 0.264 | 2.157      | 15.3        | 0.9           | 92.5         |
| MODEL 3 | 0.9881 | 0.279 | 2.176      | 15.1        | 0.5           | 91.8         |
| MODEL 4 | 0.9855 | 0.298 | 2.192      | 14.8        | 0.5           | 91.1         |
| MODEL 5 | 0.9847 | 0.307 | 2.224      | 17.5        | 0.0           | 92.1         |

Table S4: DNA and RNA sequences of the peptide vaccine constructs.

| Vaccine construct | Adjuvant               | Construct                                                                                                                                                                                                                                                                                                                                                                                                                                                                      | DNA Sequences                                                                                                                                                                                                                                                                 | RNA Sequences                                                                                                                                                                                                                                                                |
|-------------------|------------------------|--------------------------------------------------------------------------------------------------------------------------------------------------------------------------------------------------------------------------------------------------------------------------------------------------------------------------------------------------------------------------------------------------------------------------------------------------------------------------------|-------------------------------------------------------------------------------------------------------------------------------------------------------------------------------------------------------------------------------------------------------------------------------|------------------------------------------------------------------------------------------------------------------------------------------------------------------------------------------------------------------------------------------------------------------------------|
| LSDV-V1           | Beta defensin adjuvant | EAAAKLALLFLVLSAGSGFTQ<br>GVRNHVTCRINRGFCVPIRCP<br>GRTRQIGTCFGPRIKCCRSWE<br>AAAKAKFVAAWTLKAAAGG<br>GSEGVYLCSTITDTRCN <del>PG</del><br><del>PG</del> <del>PK</del> KALIIKEVKRKYLAAYNV<br>LDYDRSKGGG <del>SH</del> EYGAEALE<br>RAGGGGSYGLVKKKNNIWV<br>DVNS <del>GP</del> <del>PG</del> <del>PK</del> KNVSIRHLKVI<br>SLAAYAIFMLVSTIGGG <del>SH</del> EY<br>GAEALERAGGGGSYTTQQYC<br>NVSPFINDN <del>GP</del> <del>PG</del> <del>PK</del> KTDLS<br>LLKRRIQAA <del>Y</del> DKKGCIVEFHE | GAAGCTGCTGCTAAACT<br>GGCTCTGCTGTTCTGGT<br>TCTGTCTGCTGGTTCTGG<br>TTTCACCCAGGGTGTTT<br>GTAACCACGTTACCTGC<br>CGTATCAACCGTGTTT<br>CTGCGTTCGATCCGTT<br>GCCCCGGGTCGTACCCGT<br>CAGATCGGTACCTGCTT<br>CGGTCCGCGTATCAAAT<br>GCTGCCGTTCTTGGGAA<br>GCTGCTGCTAAAGCTAA<br>ATTCGTTGCTGCTTGAC | GAAGCUGCUGCUAAACU<br>GGCUCUGCUGUCCUGG<br>UUCUGUCUGCUGGUUCU<br>GGUUUCACCCAGGGUGU<br>UCGUAACCACGUUACCU<br>GCCGUAUCAACCGUGGU<br>UUCUGCGUCCGAUCCG<br>UUGCCCCGGGUCGUACCC<br>GUCAGAUCCGUACCUGC<br>UUCGGUCCGCGUAUCAA<br>AUGCUGCCGUUCUUGGG<br>AAGCUGCUGCUAAAGCU<br>AAAUUCGUUGCUGCUUG |

|  |  |                                 |                                                                                                                                                                                                                                                                                                                                                                                                                                                                                                                                                                                                                                                                                                                                                                                                                                    |                                                                                                                                                                                                                                                                                                                                                                                                                                                                                                                                                                                                                                                                                                                                                                                                                                          |
|--|--|---------------------------------|------------------------------------------------------------------------------------------------------------------------------------------------------------------------------------------------------------------------------------------------------------------------------------------------------------------------------------------------------------------------------------------------------------------------------------------------------------------------------------------------------------------------------------------------------------------------------------------------------------------------------------------------------------------------------------------------------------------------------------------------------------------------------------------------------------------------------------|------------------------------------------------------------------------------------------------------------------------------------------------------------------------------------------------------------------------------------------------------------------------------------------------------------------------------------------------------------------------------------------------------------------------------------------------------------------------------------------------------------------------------------------------------------------------------------------------------------------------------------------------------------------------------------------------------------------------------------------------------------------------------------------------------------------------------------------|
|  |  | YGAEALERAGAKFVAAWTLK<br>AAAGGGS | CCTGAAAGCTGCTGCTG<br>GTGGTGGTTCTGAAGGT<br>GTTTACCTGTGCTCTATC<br>ACCACCGACACCCGTTG<br>CAACCCGGGTCCGGGTC<br>CGGGTAAAAAAGCTCTG<br>ATCATCAAAGAAGTTAA<br>ACGTAAATACCTGGCTG<br>CTTACAACGTTCTGGAC<br>TACGACCGTTCTAAAGG<br>TGGTGGTTCTCACGAAT<br>ACGGTGCTGAAGCTCTG<br>GAACGTGCTGGTGGTGG<br>TGGTTCTTACGGTCTGGT<br>TAAAAAACAAC<br>ATCTGGGTGACGTTAA<br>CTCTGGTCCGGGTCCGG<br>GTAAAAAACGTTTCT<br>ATCCGTCACCTGAAAGT<br>TATCTCTCTGGCTGCTTA<br>CGCTATCTTCATGCTGGT<br>TTCTACCATCGGTGGTG<br>GTTCTCACGAATACGGT<br>GCTGAAGCTCTGGAACG<br>TGCTGGTGGTGGTGGTT<br>CTTACACCACCCAGCAG<br>TACTGCAACGTTTCTCC<br>GTTCATCAACGACAACG<br>GTCCGGGTCCGGGTAAA<br>AAAAAAACCGACCTGTC<br>TCTGCTGAAACGTCGTA<br>TCCAGGCTGCTTACGAC<br>AAAAAAGGTTGCATCGT<br>TGAATTCCACGAATACG<br>GTGCTGAAGCTCTGGAA<br>CGTGCTGGTGCTAAATT<br>CGTTGCTGCTTGGACCC<br>TGAAAGCTGCTGCTGGT<br>GGTGGTTCT | GACCCUGAAAGCUGCUG<br>CUGGUGGUGGUUCUGA<br>AGGUGUUUACCUGUGCU<br>CUAUCACCACCGACACC<br>CGUUGCAACCCGGGUCC<br>GGGUCCGGGUAAAAAA<br>GCUCUGAUCAUCAAAGA<br>AGUUAACGUAAAUAC<br>CUGGCUGCUUACAACGU<br>UCUGGACUACGACCGUU<br>CUAAGGUGGUGGUUC<br>UCACGAUACGGUGCUG<br>AAGCUCUGGAACGUGCU<br>GGUGGUGGUGGUUCUU<br>ACGGUCUGGUUAAAAA<br>AAAAAACAACUCUGG<br>GUUGACGUUACUCUGG<br>UCCGGGUCCGGGUAAAA<br>AAAACGUUUCUACCGU<br>CACCUGAAAGUUUUCUC<br>UCUGGCUGCUUACGCUA<br>UCUUCAUGCUGGUUCU<br>ACCAUCGGUGGUGGUUC<br>UCACGAUACGGUGCUG<br>AAGCUCUGGAACGUGCU<br>GGUGGUGGUGGUUCUU<br>ACACCACCCAGCAGUAC<br>UGCAACGUUUCUCCGUU<br>CAUCAACGACAACGGUC<br>CGGGUCCGGGUAAAAAA<br>AAAACCGACCUGUCUCU<br>GCUGAAACGUCGUAUCC<br>AGGCUGCUUACGACAAA<br>AAAGGUUGCAUCGUUG<br>AAUUCCACGAUACGGU<br>GCUGAAGCUCUGGAACG<br>UGCUGGUGCUAAAUUCG<br>UUGCUGCUUGGACCCUG<br>AAAGCUGCUGCUGGUGG<br>UGGUUCU |
|--|--|---------------------------------|------------------------------------------------------------------------------------------------------------------------------------------------------------------------------------------------------------------------------------------------------------------------------------------------------------------------------------------------------------------------------------------------------------------------------------------------------------------------------------------------------------------------------------------------------------------------------------------------------------------------------------------------------------------------------------------------------------------------------------------------------------------------------------------------------------------------------------|------------------------------------------------------------------------------------------------------------------------------------------------------------------------------------------------------------------------------------------------------------------------------------------------------------------------------------------------------------------------------------------------------------------------------------------------------------------------------------------------------------------------------------------------------------------------------------------------------------------------------------------------------------------------------------------------------------------------------------------------------------------------------------------------------------------------------------------|

|              |                                  |                                                                                                                                                                                                                                                                                                                                                             |                                                                                                                                                                                                                                                                                                                                                                                                                                                                                                                                                                                                                                                                                                                                                                                                                                                                                                                                                                                                                                                                         |                                                                                                                                                                                                                                                                                                                                                                                                                                                                                                                                                                                                                                                                                                                                                                                                                                                                                                                                                                                                                                                           |
|--------------|----------------------------------|-------------------------------------------------------------------------------------------------------------------------------------------------------------------------------------------------------------------------------------------------------------------------------------------------------------------------------------------------------------|-------------------------------------------------------------------------------------------------------------------------------------------------------------------------------------------------------------------------------------------------------------------------------------------------------------------------------------------------------------------------------------------------------------------------------------------------------------------------------------------------------------------------------------------------------------------------------------------------------------------------------------------------------------------------------------------------------------------------------------------------------------------------------------------------------------------------------------------------------------------------------------------------------------------------------------------------------------------------------------------------------------------------------------------------------------------------|-----------------------------------------------------------------------------------------------------------------------------------------------------------------------------------------------------------------------------------------------------------------------------------------------------------------------------------------------------------------------------------------------------------------------------------------------------------------------------------------------------------------------------------------------------------------------------------------------------------------------------------------------------------------------------------------------------------------------------------------------------------------------------------------------------------------------------------------------------------------------------------------------------------------------------------------------------------------------------------------------------------------------------------------------------------|
| LSDV -<br>V2 | Beta<br>defensin<br>adjuvan<br>t | EAAAKLALLFLVLSAGSGFTQ<br>GVRNHVTCRINRGFCVPIRCP<br>GRTRQIGTCFGPRIKCCRSWE<br>AAAKAKFVAAWTLKAAAGG<br>GSNSVIGTNYELLCINTKPGP<br>PGKKLIIKEVKRKYLSAAYNST<br>IALGKNGGGSHEYGAALER<br>AGGGGSLSNIKKSSKGDINAC<br>YGPGPKKVSYIICVKRLYN<br>AYNVSCNYVSYGGGSHEYGA<br>EALERAGGGGSKGCIVEFGSQ<br>EKVCVTGPGPKKDLSLLKRR<br>IQKVAAAYDFWIKFISIHEYGAE<br>ALERAGAKFVAAWTLKAAA<br>GGGS | GAAGCTGCTGCTAAACT<br>GGCTCTGCTGTTCTCTGGT<br>TCTGTCTGCTGGTTCTGG<br>TTTCACCCAGGGTGTTT<br>GTAACCACGTTACCTGC<br>CGTATCAACCGTGGTTT<br>CTGCGTTCCGATCCGTT<br>GCCCCGGGTCGTACCCGT<br>CAGATCGGTACCTGCTT<br>CGGTCCGCGTATCAAAT<br>GCTGCCGTTCTTGGGAA<br>GCTGCTGCTAAAGCTAA<br>ATTGCTTGCTGCTTGGAC<br>CCTGAAAGCTGCTGCTG<br>GTGGTGGTTCTAACTCT<br>GTTATCGGTACCAACTA<br>CGAACTGCTGTGCATCA<br>ACACCAAAGGTCCGGGT<br>CCGGGTAAAAAACTGAT<br>CATCAAAGAAGTTAAAC<br>GTAAATACCTGTCTGCT<br>GCTTACAACCTTACCAT<br>CGCTCTGGGTAAAAACG<br>GTGGTGGTTCTCACGAA<br>TACGGTGCTGAAGCTCT<br>GGAACGTGCTGGTGGTG<br>GTGGTTCTCTGTCTAACA<br>TCAAAAAATCTTCTAAA<br>GGTGACATCAACGCTTG<br>CTACGGTCCGGGTCCGG<br>GTAAAAAAGTTTCTTAC<br>ATCATCTGCGTTAAACG<br>TCTGTACAACGCTGCTT<br>ACAACGTTTCTTGCAAC<br>TACGTTTCTTACGGTGGT<br>GGTTCTCACGAATACGG<br>TGCTGAAGCTCTGGAAC<br>GTGCTGGTGGTGGTGGT<br>TCTAAAGTTGCATCGT<br>TGAATTCGGTTCTCAGG<br>AAAAAGTTTGCGTTACC<br>GGTCCGGGTCCGGGTAA<br>AAAAGACCTGTCTCTGC<br>TGAAACGTCGTATCCAG<br>AAAGTTGCTGCTTACGA<br>CTTCTGGATCAAATTCA<br>TCTCTATCCACGAATAC<br>GGTGCTGAAGCTCTGGA<br>ACGTGCTGGTGCTAAAT | GAAGCUGCUGCUAAACU<br>GGCUCUGCUGUCCUGG<br>UUCUGUCUGCUGGUUCU<br>GGUUUCACCCAGGGUGU<br>UCGUAACCACGUUACCU<br>GCCGUAUCAACCGUGGU<br>UUCUGCGUCCGAUCCG<br>UUGCCCCGGGUCGUACCC<br>GUCAGAUCCGUACCUGC<br>UUCGGUCCGCGUAUCAA<br>AUGCUGCCGUUCUUGGG<br>AAGCUGCUGCUAAAGCU<br>AAAUUCGUUGCUGCUUG<br>GACCCUGAAAGCUGCUG<br>CUGGUGGUGGUUCUAAAC<br>UCUGUUAUCGGUACCAA<br>CUACGAACUGCUGUGCA<br>UCAACACCAAAGGUCCG<br>GGUCCGGUAAAAAACU<br>GAUCAUCAAGAAGUU<br>AAACGUAAAUACCUGUC<br>UGCUGCUUACAACUCUA<br>CCAUCGCUCUGGGUAAA<br>AACGGUGGUGGUUCUCA<br>CGAAUACGGUGCUGAAG<br>CUCUGGAACGUGCUGGU<br>GGUGGUGGUUCUCUGUC<br>UAACAUCAAAAAAUCU<br>UCUAAAAGGUGACAUCA<br>ACGCUUGCUCACGGUCCG<br>GGUCCGGUAAAAAAG<br>UUUCUUACAUCUACUGC<br>GUUAAAACGUCUGUACA<br>ACGCUGCUUACAACGUU<br>UCUUGCAACUACGUUUC<br>UUACGGUGGUGGUUCUC<br>ACGAAUACGGUGCUGAA<br>GCUCUGGAACGUGCUGG<br>UGGUGGUGGUUCUAAA<br>GGUUGCAUCGUUGAAU<br>UCGGUUCUCAGGAAAAA<br>GUUUGCGUUAACGGUCC<br>GGGUCCGGGUAAAAAA<br>GACCUGUCUCUGCUGAA<br>ACGUCGUAUCCAGAAAG<br>UUGCUGCUUACGACUUC<br>UGGAUCAAAUUCUUCUC<br>UAUCCACGAAUACGGUG<br>CUGAAGCUCUGGAACGU |
|--------------|----------------------------------|-------------------------------------------------------------------------------------------------------------------------------------------------------------------------------------------------------------------------------------------------------------------------------------------------------------------------------------------------------------|-------------------------------------------------------------------------------------------------------------------------------------------------------------------------------------------------------------------------------------------------------------------------------------------------------------------------------------------------------------------------------------------------------------------------------------------------------------------------------------------------------------------------------------------------------------------------------------------------------------------------------------------------------------------------------------------------------------------------------------------------------------------------------------------------------------------------------------------------------------------------------------------------------------------------------------------------------------------------------------------------------------------------------------------------------------------------|-----------------------------------------------------------------------------------------------------------------------------------------------------------------------------------------------------------------------------------------------------------------------------------------------------------------------------------------------------------------------------------------------------------------------------------------------------------------------------------------------------------------------------------------------------------------------------------------------------------------------------------------------------------------------------------------------------------------------------------------------------------------------------------------------------------------------------------------------------------------------------------------------------------------------------------------------------------------------------------------------------------------------------------------------------------|

|              |                                  |                                                                                                                                                                                                                                                                                                                                                                                               |                                                                                                                                                                                                                                                                                                                                                                                                                                                                                                                                                                                                                                                                                                                                                                                                                             |                                                                                                                                                                                                                                                                                                                                                                                                                                                                                                                                                                                                                                                                                                                                                                                                               |
|--------------|----------------------------------|-----------------------------------------------------------------------------------------------------------------------------------------------------------------------------------------------------------------------------------------------------------------------------------------------------------------------------------------------------------------------------------------------|-----------------------------------------------------------------------------------------------------------------------------------------------------------------------------------------------------------------------------------------------------------------------------------------------------------------------------------------------------------------------------------------------------------------------------------------------------------------------------------------------------------------------------------------------------------------------------------------------------------------------------------------------------------------------------------------------------------------------------------------------------------------------------------------------------------------------------|---------------------------------------------------------------------------------------------------------------------------------------------------------------------------------------------------------------------------------------------------------------------------------------------------------------------------------------------------------------------------------------------------------------------------------------------------------------------------------------------------------------------------------------------------------------------------------------------------------------------------------------------------------------------------------------------------------------------------------------------------------------------------------------------------------------|
|              |                                  |                                                                                                                                                                                                                                                                                                                                                                                               | TCGTTGCTGCTTGGACC<br>CTGAAAGCTGCTGCTGG<br>TGGTGGTTCT                                                                                                                                                                                                                                                                                                                                                                                                                                                                                                                                                                                                                                                                                                                                                                        | GCUGGUGCUAAAUUCGU<br>UGCUGCUUGGACCCUGA<br>AAGCUGCUGCUGGUGGU<br>GGUUCU                                                                                                                                                                                                                                                                                                                                                                                                                                                                                                                                                                                                                                                                                                                                         |
| LSDV -<br>V3 | Beta<br>defensin<br>adjuvan<br>t | <a href="#">EAAAK</a> LALLFLVLSAGSGFTQ<br>GVRNHVTCRINRGFCVPIRCP<br>GRTRQIGTCFGPRIKCCRSWE<br><a href="#">AAAKAKFVA</a> AWTLKAAAGG<br>GSSITTDTRCNPKNLALKGPG<br>PGKKIALIIEVKRKYAAYTV<br>NFLNSTIGGGSHEYGAELER<br>AGGGGSSCNYVSYIICVKRLY<br>NPGPGKKSIRHLKVISLTYA<br>AYNYVSYIICVGGGSHEYGAE<br>ALERAGGGGSKGCIVEFGSQE<br>KVCVTGPGPGKKVFIKRQDV<br>NTVLAAYNTDDFWIKFHEYG<br>AEALERAGAKFVAAWTLKA<br>AAGGGS | GAAGCTGCTGCTAAACT<br>GGCTCTGCTGTTCTTGGT<br>TCTGTCTGCTGGTTCTGG<br>TTTACCCAGGGTGTTT<br>GTAACCACGTTACCTGC<br>CGTATCAACCGTGTTT<br>CTGCGTTCGATCCGT<br>GCCCCGGTCTACCCGT<br>CAGATCGGTACCTGCTT<br>CGGTCCGCGTATCAAAT<br>GCTGCCGTTCTTGGGAA<br>GCTGCTGCTAAAGCTAA<br>ATTGCTTGCTGCTTGGAC<br>CCTGAAAGCTGCTGCTG<br>GTGGTGGTTCTTCTATCA<br>CCACCGACACCCGTTGC<br>AACCCGAAAAACCTGG<br>CTCTGAAAGGTCCGGGT<br>CCGGGTAAAAAAATCG<br>CTCTGATCATCAAAGAA<br>GTAAACGTAAATACGC<br>TGCTTACACCGTTAACTT<br>CCTGAACTCTACCATCG<br>GTGGTGGTTCTCACGAA<br>TACGGTGCTGAAGCTCT<br>GGAACGTGCTGGTGGTG<br>GTGGTTCTTCTTGCAACT<br>ACGTTTCTTACATCATCT<br>GCGTTAAACGTCTGTAC<br>AACGGTCCGGGTCCGGG<br>TAAAAAATCTATCCGTC<br>ACCTGAAAGTTATCTCT<br>CTGACCTACGCTGCTTA<br>CAACTACGTTTCTTACAT<br>CATCTGCGTTGGTGGTG<br>GTTCTCACGAATACGGT<br>GCTGAAAGCTCTGGAACG<br>TGCTGGTGGTGGTGGTT | GAAGCUGCUGCUAAACU<br>GGCUCUGCUGUCCUGG<br>UUCUGUCUGCUGGUUCU<br>GGUUUCACCCAGGGUGU<br>UCGUAACCACGUUACCU<br>GCCGUAUCAACCGUGGU<br>UUCUGCGUCCGAUCCG<br>UUGCCCGGGUCGUACCC<br>GUCAGAUCCGUACCUGC<br>UUCGGUCCGCGUAUCAA<br>AUGCUGCCGUUCUUGGG<br>AAGCUGCUGCUAAAGCU<br>AAAUUCGUUGCUGCUUG<br>GACCCUGAAAGCUGCUG<br>CUGGUGGUGGUUCUUCU<br>AUCACCACCGACACCCG<br>UUGCAACCCGAAAAACC<br>UGGCUCUGAAAGGUCCG<br>GGUCCGGGUAAAAAAA<br>UCGCUCUGAUCAUCAA<br>GAAGUUAACGUAAAU<br>ACGCUGCUUACACCGUU<br>AACUCCUGAACUCUAC<br>CAUCGGUGGUGGUUCUC<br>ACGAAUACGGUGCUGAA<br>GCUCUGGAACGUGCUGG<br>UGGUGGUGGUUCUUCU<br>UGCAACUACGUUUCUUA<br>CAUCAUCUGCGUAAAC<br>GUCUGUACAACGGUCCG<br>GGUCCGGGUAAAAAUC<br>UAUCCGUCACCUGAAAG<br>UUAUCUCUCUGACCUAC<br>GCUGCUUACAACUACGU<br>UUCUUAUCAUCUGCG<br>UUGGUGGUGGUUCUCAC<br>GAUACGGUGCUGAAGC<br>UCUGGAACGUGCUGGUG |

|  |  |  |                                                                                                                                                                                                                                                                                             |                                                                                                                                                                                                                                                                                                       |
|--|--|--|---------------------------------------------------------------------------------------------------------------------------------------------------------------------------------------------------------------------------------------------------------------------------------------------|-------------------------------------------------------------------------------------------------------------------------------------------------------------------------------------------------------------------------------------------------------------------------------------------------------|
|  |  |  | CTAAAGGTTGCATCGTT<br>GAATTCGGTTCTCAGGA<br>AAAAGTTTTCGTTACCG<br>GTCCGGGTCCGGGTAAA<br>AAAGTTTTTCATCAAACG<br>TCAGGACGTTAACACCG<br>TTCTGGCTGCTTACAAC<br>ACCGACGACTTCTGGAT<br>CAAATTCCACGAATACG<br>GTGCTGAAGCTCTGGAA<br>CGTGCTGGTGCTAAATT<br>CGTTGCTGCTTGGACCC<br>TGAAAGCTGCTGCTGGT<br>GGTGGTTCT | GUGGUGGUUCUAAAGG<br>UUGCAUCGUUGAAUUCG<br>GUUCUCAGGAAAAAGU<br>UUGCGUUACCGGUCCGG<br>GUCCGGGUAAAAAGU<br>UUUCAUCAAACGUCAGG<br>ACGUUAAACACCGUUCUG<br>GCUGCUUACAACACCGA<br>CGACUUCUGGAUCAAU<br>UCCACGAUACGGUGCU<br>GAAGCUCUGGAACGUGC<br>UGGUGCUAAAUUCGUU<br>GCUGCUUGGACCCUGAA<br>AGCUGCUGCUGGUGGUG<br>GUUCU |
|--|--|--|---------------------------------------------------------------------------------------------------------------------------------------------------------------------------------------------------------------------------------------------------------------------------------------------|-------------------------------------------------------------------------------------------------------------------------------------------------------------------------------------------------------------------------------------------------------------------------------------------------------|

Table S5: Different residues of vaccine construct and TLR4 involved in hydrogen bonding.

| NO. | NAME    | NO.    | CHAIN   | NAME | NO. | CHAIN |
|-----|---------|--------|---------|------|-----|-------|
| 1.  | GLN 39  | A <--> | GLY 16  | B    |     |       |
| 2.  | ASP 84  | A <--> | ARG 46  | B    |     |       |
| 3.  | ASP 84  | A <--> | ARG 46  | B    |     |       |
| 4.  | SER 86  | A <--> | ARG 46  | B    |     |       |
| 5.  | ARG 87  | A <--> | ASN 190 | B    |     |       |
| 6.  | LYS 130 | A <--> | GLN 47  | B    |     |       |
| 7.  | GLU 135 | A <--> | TRP 62  | B    |     |       |
| 8.  | GLU 135 | A <--> | ARG 44  | B    |     |       |
| 9.  | GLU 135 | A <--> | ARG 44  | B    |     |       |
| 10. | GLU 154 | A <--> | ARG 40  | B    |     |       |
| 11. | ASP 181 | A <--> | ARG 40  | B    |     |       |
| 12. | ASP 181 | A <--> | ARG 40  | B    |     |       |
| 13. | ASP 181 | A <--> | GLY 43  | B    |     |       |
| 14. | ARG 234 | A <--> | CYS 36  | B    |     |       |
| 15. | ARG 257 | A <--> | PRO 38  | B    |     |       |
| 16. | ARG 257 | A <--> | ILE 39  | B    |     |       |
| 17. | LYS 264 | A <--> | ARG 33  | B    |     |       |
| 18. | LYS 264 | A <--> | GLY 34  | B    |     |       |
| 19. | ARG 382 | A <--> | GLY 133 | B    |     |       |
| 20. | ARG 382 | A <--> | TYR 138 | B    |     |       |

21. ASP 617 A <--> ARG 115 B

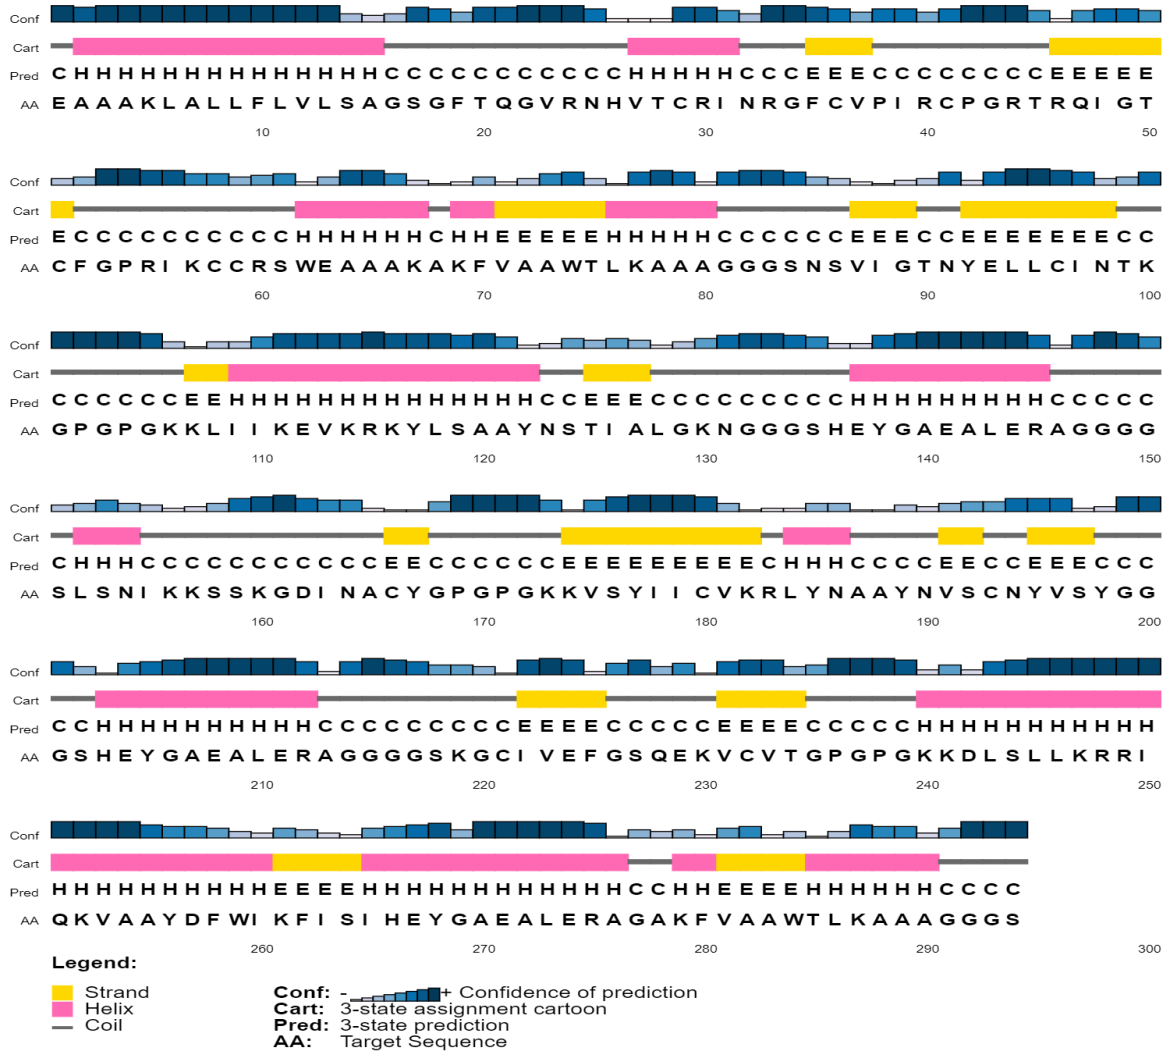

Figure S1a: Secondary structure prediction of LSDV-V1 by PSIPRED server.

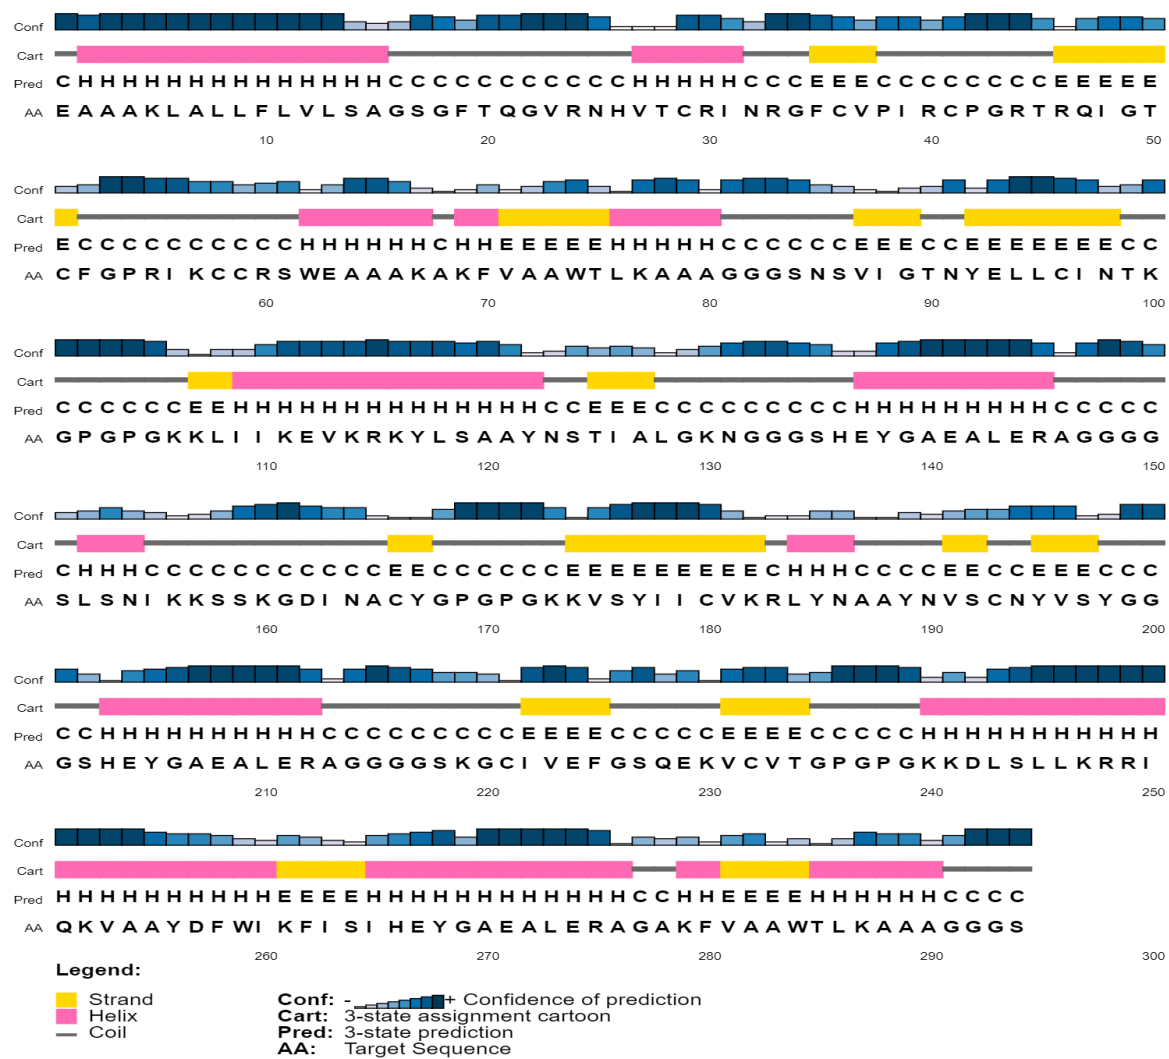

Figure S1b: Secondary structure prediction of LSDV-V2 by PSIPRED server.

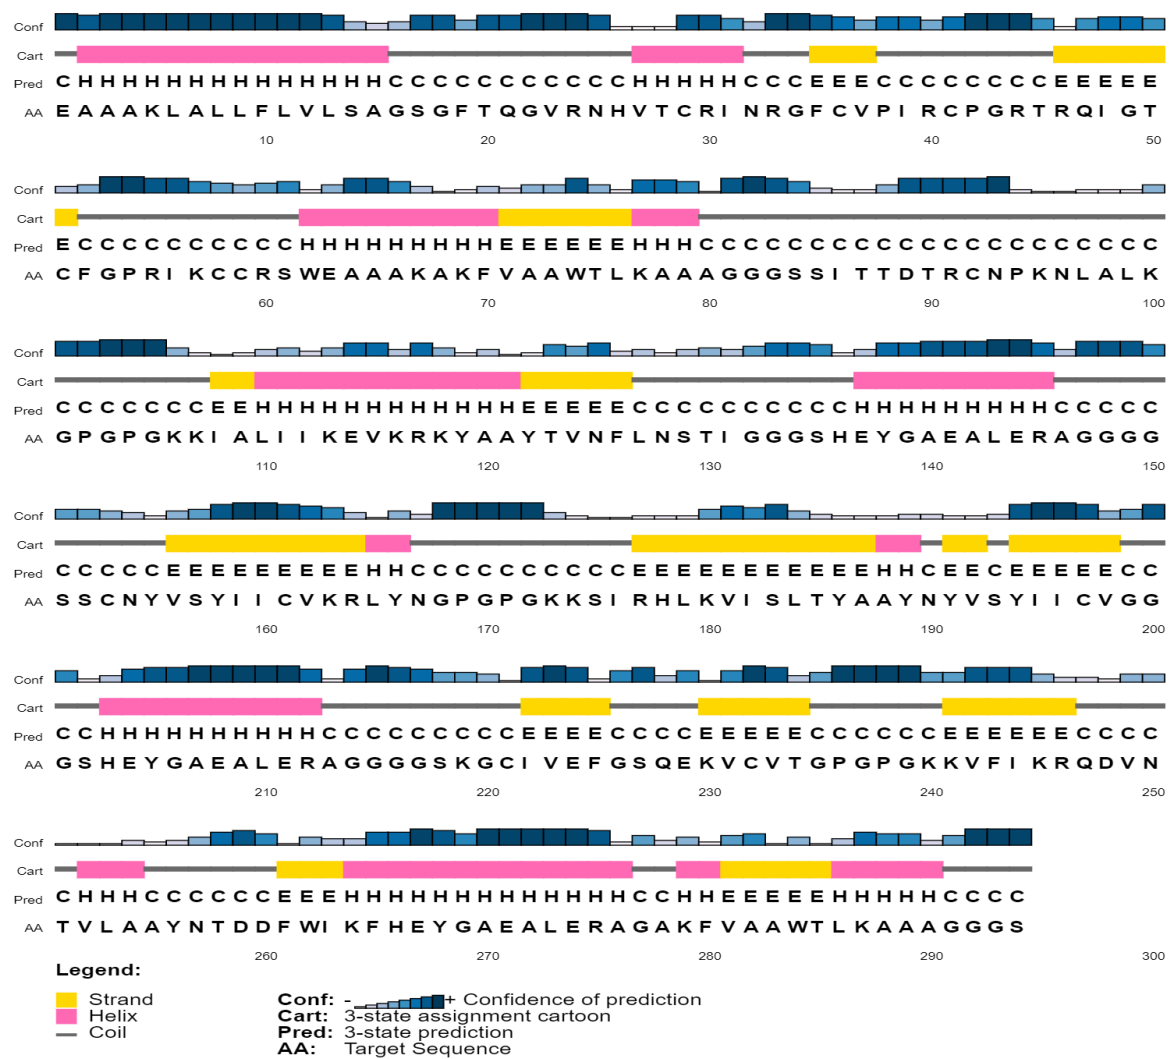

Figure S1c: Secondary structure prediction of LSDV-V3 by PSIPRED server.

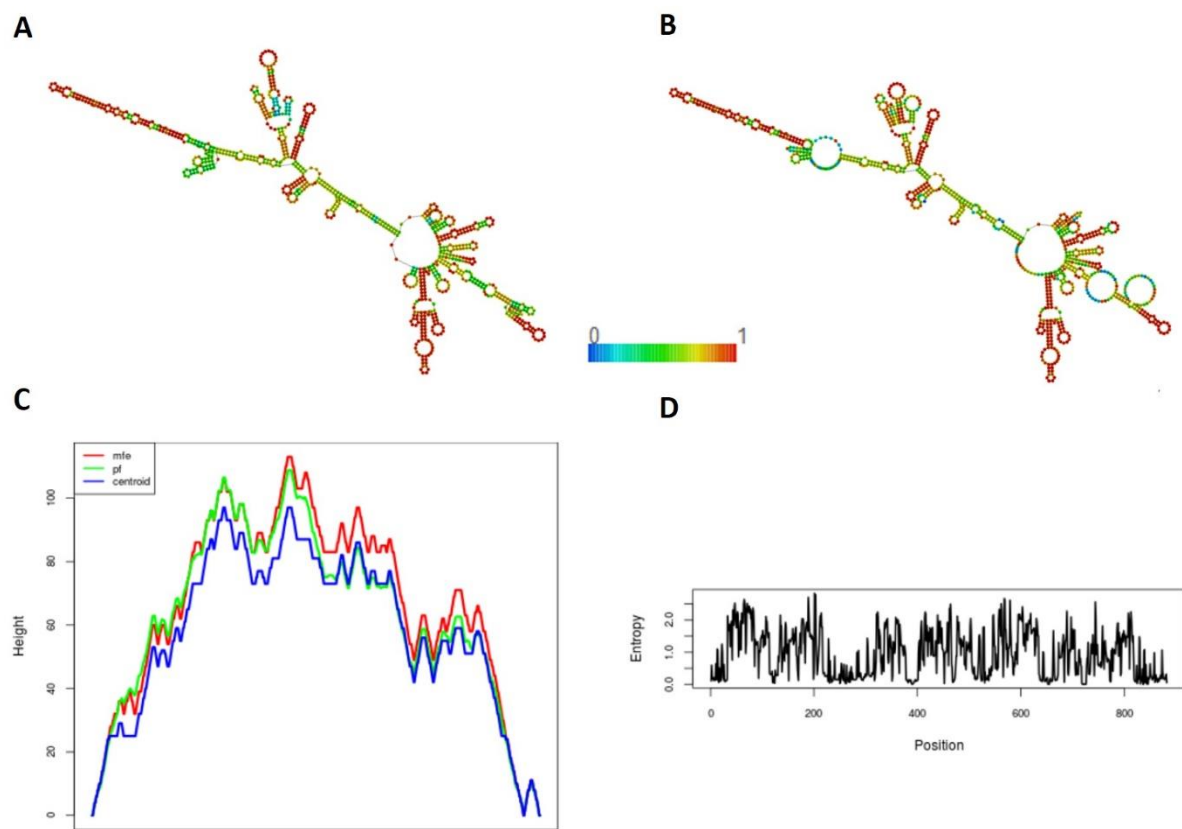

Figure S2a: Secondary Structure prediction of the prioritized LSDV-V1 mRNA construct. (A) Model presentation of minimum free energy of the LSDV-V1 mRNA structure (B) The proposed model of the minimum free energy (MFE) of secondary centroid LSDV-V1 mRNA structure (C) The mountain plot representation of the MFE structure, the thermodynamic ensemble of RNA structures, and the centroid structure. (D) The positional entropy plot for each position.

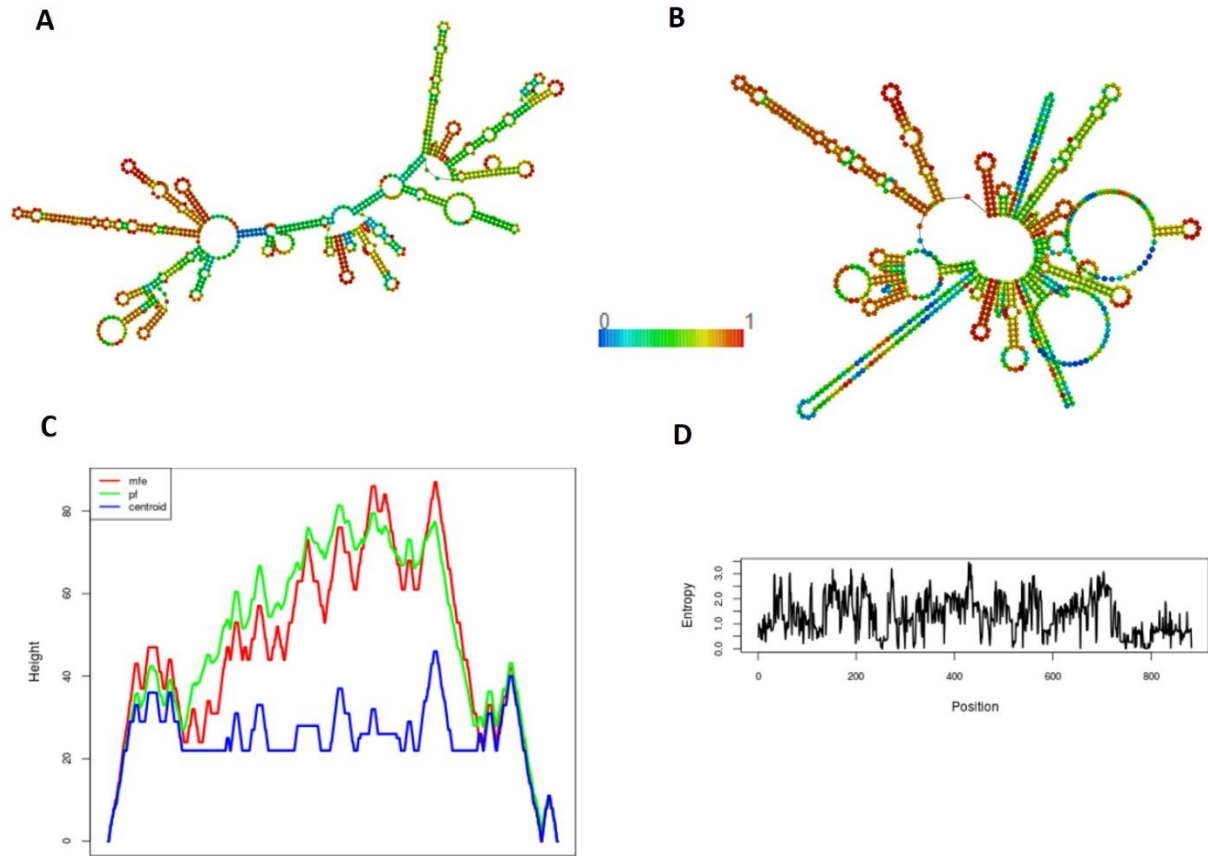

Figure S2b: Secondary Structure prediction of the prioritized LSDV-V3 mRNA construct. (A) Model presentation of minimum free energy of the LSDV-V3 mRNA structure (B) The proposed model of the minimum free energy of secondary centroid LSDV-V3 mRNA structure (C) The mountain plot representation of the MFE structure, the thermodynamic ensemble of mRNA structure, and the centroid structure. (D) The positional entropy plot for each position.

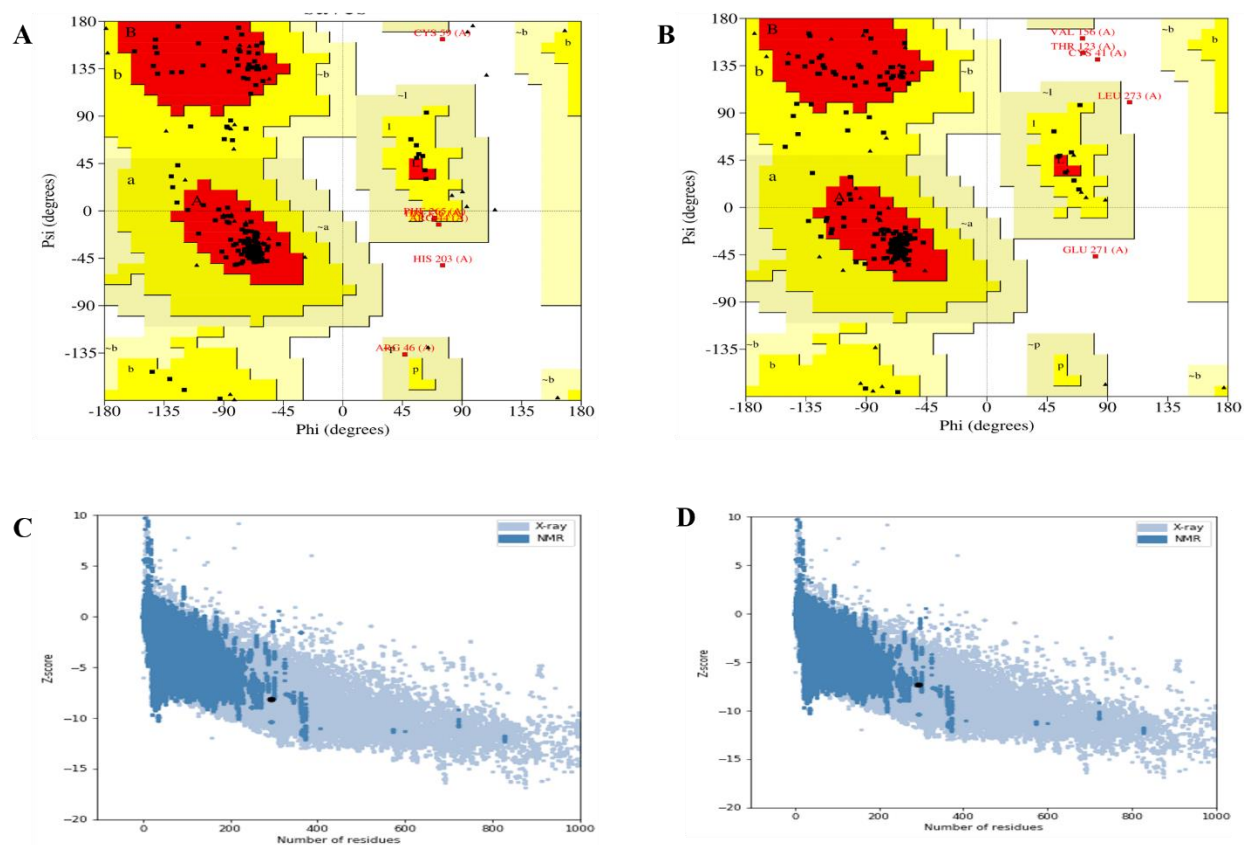

Figure S3: Three-dimensional structural validation of V1 and V3. (A) (B) Ramachandran plots showing 89.1% residues of V1 and 89.96% residues of V3 in the most favored regions of plots. (C) (D) structural validation by proSA web showing Z scores of -8.11 and -7.28 of V1 and V3 respectively.

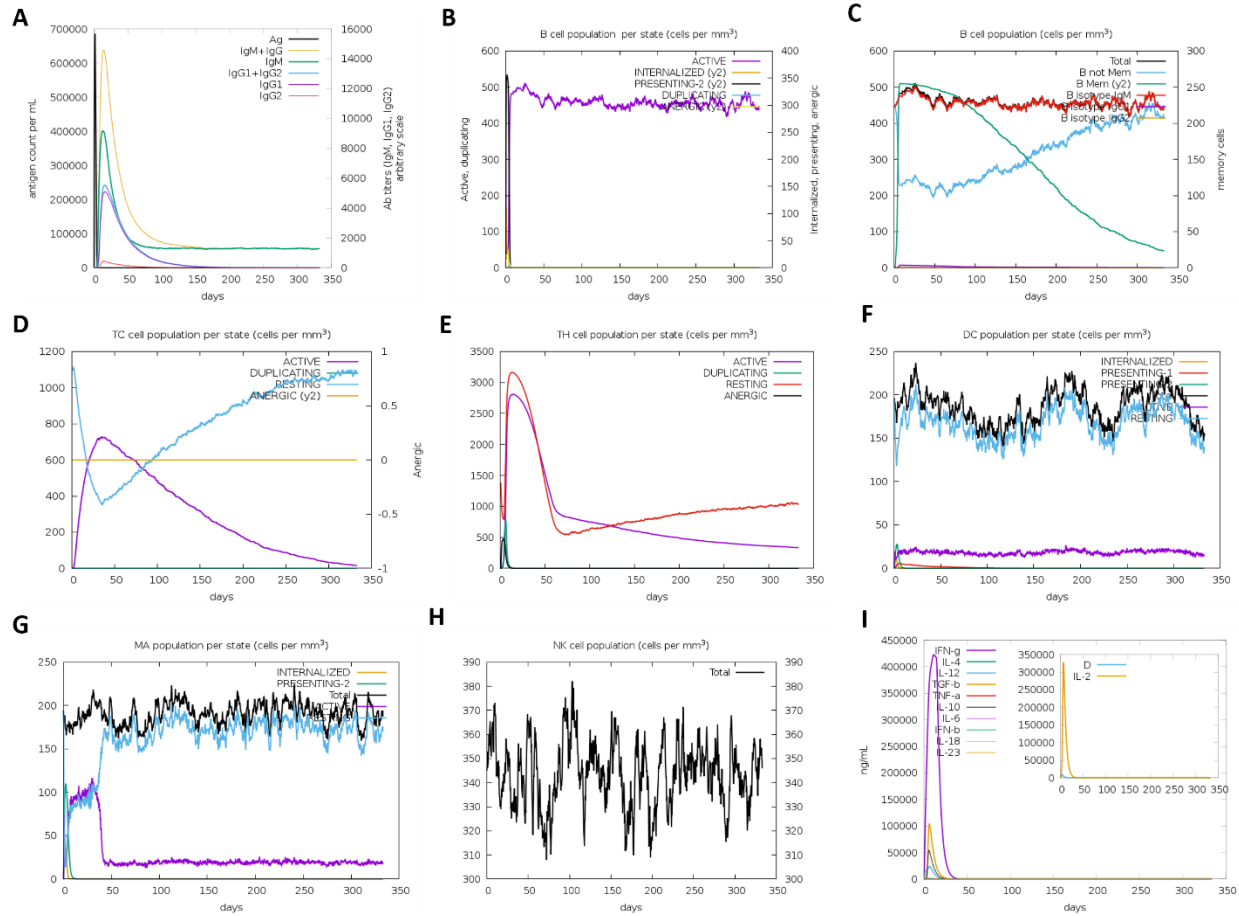

Figure S4: *In silico* immune simulation of LSDV-V2 chimeric peptide predicted by C-ImmSim Server. (A, B) Elevated level of immunoglobulin antibodies as well as B – cell populations while a decrease in antigen levels upon vaccine injections. (C) Significant increase in B- cell populations after repeated exposure to antigen. (D, E) The increase in the population of T -cytotoxic and T –helper cells upon repeated exposure. (F, G, H) The population increase of dendritic cells, macrophages, and natural killer cells during the immunization period. (I) increased concentration of cytokine and interleukin levels after repeated antigen exposure. Inset plot shows danger signal together with leukocyte growth factor IL-2.

## Section S1

### mRNA Vaccine Construct

5' m7GCap– 5' UTR–Kozak sequence–Signal peptide (tPA)–EAAAK-Adjuvant-peptide vaccine sequence-MITD sequence- Stop codon- 3' UTR-Poly (A) tail.

#### 5'm7G Cap

#### 5'UTR

NCA-7d (Derived from NCA-7)

GGCAAAAUAUCAAUCAAUCAUCAACAACAUAACAUAUCAAUCAAACACAUCAUCAAGACACCA  
CCGCCGCCGCAUGGCG

#### Kozak Sequence

GCCGCC(A/G)(C/A)CAUGGCG

GCCGCCGCCAUGGCG

#### Signal Peptide

>sp|Q28198|TPA\_BOVIN                      Tissue-type                      plasminogen                      activator                      OS=Bos                      taurus  
ATGATGAGCGCCATGAAGACCGAGTTCCTGTGCGTGCTGCTGCTGTCGCGCGCCGTGTTACACGACCCAGC  
CAGGAGACCTACAGGAGGCTGAGGAGGGGCGCCAGGAGCTACAAGGTGACCTGCAGGGACGGCAAGACCC  
AGATGACCTACAGGCAGCACGACAGCTGGCTGAGGCCCCCTGCTGAGGGGCAACCAGGTGGAGCACTGCTGG  
TGCGACGGCGGCAGGGCCAGTGCCACAGCGTGCCCGTGAGGAGCTGCAGCGAGCCCTGGTGCTTCAACGG  
CGGCACCTGCAGGCAGGCCCTGTACAGCAGCGACTTCGTGTGCCAGTGCCCCGAGGGCTTCATGGGCAAGC  
TGTGCGAGATCGACGCCACCGCCACCTGCTACAAGGACCAGGGCGTGCCCTACAGGGGCACCTGGAGCACC  
GCCGAGAGCGGCGCCGAGTGCGCCAAGTGAACAGCAGCGGCCTGGCCATGAAGCCCTACAGCGGCAGGA  
GGCCCAACGCCATCAGGCTGGGCCTGGGCAACCACAAGTACTGCAGGAACCCCGACAGGACAGCAAGCC  
CTGGTGCTACGTGTTCAAGGCCGGCAAGTACATCAGCGAGTTCTGCAGCACCCCGCCTGCGCCAAGGTGGC  
CGAGGAGGACGGCGACTGCTACACCGGCAACGGCCTGGCCTACAGGGGCACCAGGAGCCACACCAAGAGC  
GGCGCCAGCTGCCTGCCCTGGAACAGCGTGTTCTTGACCAGCAAGATCTACACCGCCTGGAAGAGCAACGC  
CCCCGCCCTGGGCCTGGGCAAGCACAACCACTGCAGGAACCCCGACGGCGACGCCAGCCCTGGTGCCACG  
TGTGGAAGGACAGGCAGCTGACCTGGGAGTACTGCGACGTGCCCCAGTGCGTGACCTGCGGCCTGAGGCAG  
TACAAGAGGCCCCAGTTCAGGATCAAGGGCGGCCTGTTGCGCCGACATCACCAGCCACCCCTGGCAGGCCGC  
CATCTTCGTGAAGAACAGGAGGAGCCCCGGCGAGAGGTTCTGTGCGGCGGCATCCTGATCAGCAGCTGCT  
GGGTGCTGAGCGCCGCCACTGCTTCCAGGAGAGGTACCCCCCCCACCACCTGAAGGTGTTCTGGGCAGG  
ACCTACAGGCTGGTGCCCGGCGAGGAGGAGCAGACCTTCGAGGTGGAGAAGTACATCATCCACAAGGAGTT  
CGACGACGACACCTACGACAACGACATCGCCCTGCTGCACCTGAAGAGCGACAGCCTGACCTGCGCCAGGG  
AGAGCGCCAGCGTGAGGACCATCTGCCTGCCCCAGCGCAGCCTGCAGCTGCCCCGACTGGACCGAGTGCGAG  
CTGAGCGGCTACGGCAAGCACGAGAGCAGCAGCCCCCTTCTTCAGCGAGAGGCTGAAGGAGGCCACGTGA  
GGCTGTACCCAGCAGCAGGTGCACCAGCCAGCACCTGTTCAACAGGACCGTGACCAACAACATGCTGTGC  
GCCGGCGACACCAGGAGCGGCGGGCGACCACCAACCTGCACGACGCCTGCCAGGGCGACAGCGGCGGCC  
CCCTGGTGTCATGAAGGACAACCATGACCCTGGTGGGCATCATCAGCTGGGGCCTGGGCTGCGGCAGG  
AAGGACGTGCCCGCGTGTACACCAAGGTGACCAACTACCTGGACTGGATCAGGGACAACACCAGGCCC
